# Supplementary material
Source: PubMed Central journal article supplement (PMC17205)

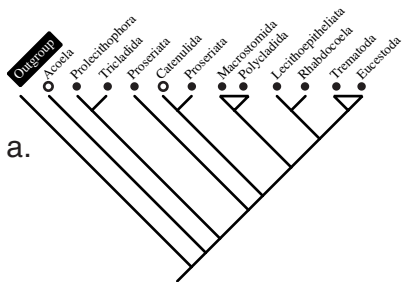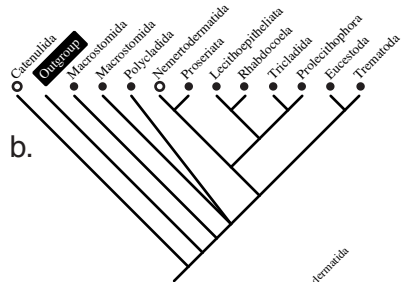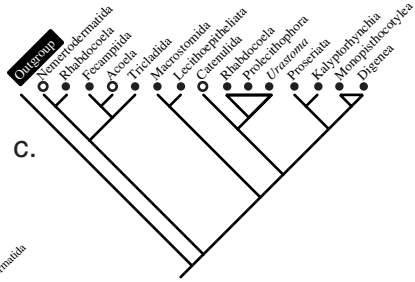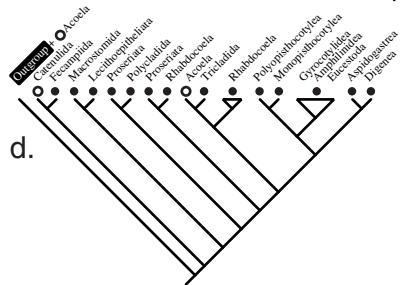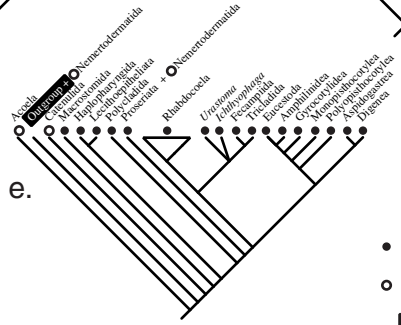

- Rhabditophora
  - non-rhabditophoran
- Outgroup**

Supplement: pnas_97_21_11359__2.pdf [file pnas_97_21_11359__2.pdf]
